# Supplementary material
Source: PubMed Central journal article supplement (PMC5198285)
Supplement: ASN.2016010105SupplementaryData.pdf [file ASN.2016010105SupplementaryData.pdf]

## **SUPPLEMENTARY APPENDIX**

**Supplemental Table 1: Multivariable Adjustment in Included Studies**

**Supplemental Table 2: Subgroup Analysis for the Association Between Acute Kidney Injury and Cardiovascular Mortality**

**Supplemental Table 3: Subgroup Analysis for the Association Between Acute Kidney Injury and Major Cardiovascular Events**

**Supplemental Table 4: Subgroup Analysis for the Association Between Acute Kidney Injury and Stroke**

**Supplemental Figure 1: Identification of Included Studies**

**Supplementary Figure 2: Association between Acute Kidney Injury and Cardiovascular Mortality**

**Supplementary Figure 3: Association between Acute Kidney Injury and Major Adverse Cardiovascular Events**

**Supplementary Figure 4: Association between Acute Kidney Injury and Congestive Heart Failure**

**Supplementary Figure 5: Association between Acute Kidney Injury and Acute Myocardial Infarction**

**Supplementary Figure 6: Association between Acute Kidney Injury and Stroke**

**Supplemental Figure 7: Funnel Plot for the Association Between Acute Kidney Injury and Congestive Heart Failure**

**Supplemental Figure 8: Funnel Plot for the Association Between Acute Kidney Injury and Acute Myocardial Infarction**

**Supplemental Table 1: Multivariable Adjustment in Included Studies**

| <b>Study</b>              | <b>Follow Up (Years)</b> | <b>Mean Age</b> | <b>Male (%)</b> | <b>Adjustment Variables In Regression model</b>                                                                                                                                                                                                                                                                                                                       | <b>Selection</b> | <b>Comparability</b> | <b>Outcome</b> |
|---------------------------|--------------------------|-----------------|-----------------|-----------------------------------------------------------------------------------------------------------------------------------------------------------------------------------------------------------------------------------------------------------------------------------------------------------------------------------------------------------------------|------------------|----------------------|----------------|
| Blair, 2011 <sup>1</sup>  | 0.8                      | 65              | 1524 (75)       | Admission renal parameter of interest (SCr, BUN, or eGFR), discharge or Day 7 renal parameter of interest (for the post-discharge analysis), age, NYHA functional class, beta-blocker use, systolic blood pressure, sodium, BUN, BNP, and NT-proBNP                                                                                                                   | ★★★              | ★                    | ★★★            |
| Chawla, 2014 <sup>2</sup> | 1.4                      | 67              | 28158 (99)      | Sex, African American race, age>80 years, mean eGFR during baseline, preadmission diabetes or hypertension, history of CAD, previous stroke, and baseline serum SALb>3 g/dl.                                                                                                                                                                                          | ★★★              | ★★                   | ★★★            |
| Choi, 2010 <sup>3</sup>   | 5.7                      | 44              | 16997 (98)      | Age, sex, race, eGFR category, albuminuria, CD4 count, hypertension, diabetes, hospitalization in the intensive care unit, calendar year, history of CVD and history of CHF.                                                                                                                                                                                          | ★★★              | ★★                   | ★★★            |
| Damman, 2009 <sup>4</sup> | 1.5                      | 71              | 551 (63)        | Age, sex, NYHA class, LVEF, treatment assignment, systolic and diastolic blood pressure, heart rate, haemoglobin levels, eGFR at baseline, the occurrence of WRF before the studied period, medical therapy, history of myocardial infarction/atrial fibrillation/diabetes/stroke/COPD/Hypertension/P eripheral artery disease/time since diagnosis of heart failure. | ★★★              | ★★                   | ★★★            |
| Damman, 2014 <sup>5</sup> | 3.8                      | 72              | 1402 (39)       | Age; sex; race; etiology of HF; New York Heart Association functional class; left ventricular ejection fraction; systolic and diastolic blood                                                                                                                                                                                                                         | ★★★              | ★                    | ★★★            |

|                               |     |    |               |                                                                                                                                                                                                                                                                                                                                                                                                                                                                                            |     |    |     |
|-------------------------------|-----|----|---------------|--------------------------------------------------------------------------------------------------------------------------------------------------------------------------------------------------------------------------------------------------------------------------------------------------------------------------------------------------------------------------------------------------------------------------------------------------------------------------------------------|-----|----|-----|
|                               |     |    |               | pressures; heart rate; history of myocardial infarction, hypertension, atrial fibrillation, stroke, and diabetes; baseline medical therapy (angiotensin-converting enzyme inhibitor, beta-blocker, diuretics, digoxin, and spironolactone); and measurement of N-terminal pro-B-type natriuretic peptide (NT-proBNP, logarithmically transformed)                                                                                                                                          |     |    |     |
| Gammelager, 2014 <sup>6</sup> | 2.7 | 59 | 11793<br>(61) | Age, sex, other heart disease, other cerebrovascular disease, hypertension, peripheral vascular disease, diabetes, CKD, cancer, surgical status at ICU admission, and primary diagnosis during current hospitalization and medications.                                                                                                                                                                                                                                                    | ★★★ | ★★ | ★★★ |
| Giacoppo, 2015 <sup>7</sup>   | 1.0 | 63 | 7064<br>(74)  | Age, sex, diabetes, creatinine clearance <60 mL/min, contrast volume (per 100 mL increase), randomization to bivalirudin, randomization to glycoprotein IIb/IIIa inhibitor history of hypertension, hyperlipidemia, anemia, previous percutaneous coronary intervention, and previous coronary artery bypass grafting.                                                                                                                                                                     | ★★★ | ★★ | ★★★ |
| Goldberg, 2009 <sup>8</sup>   | 3.0 | 60 | 1554<br>(79)  | Age, sex, estimated glomerular filtration rate (MDRD), previous diuretic therapy, history of hypertension, diabetes, smoking, previous myocardial infarction, presence of anterior infarction, Killip class, heart rate and blood pressure on admission, use of reperfusion therapy (thrombolytic therapy or primary angioplasty), medical therapy (angiotensin-converting enzyme inhibitors, angiotensin II receptor blockers and beta-blockers), and left ventricular ejection fraction. | ★★★ | ★★ | ★★★ |

|                              |     |    |               |                                                                                                                                                                                                                                                                                                                                                                            |     |    |     |
|------------------------------|-----|----|---------------|----------------------------------------------------------------------------------------------------------------------------------------------------------------------------------------------------------------------------------------------------------------------------------------------------------------------------------------------------------------------------|-----|----|-----|
| Hansen, 2015 <sup>9</sup>    | 2.7 | 68 | 3342<br>(70)  | Sex, age, smoking, BMI, history of ischemic peripheral disease, previous stroke, previous myocardial infarction, history of arrhythmias, diabetes mellitus, dyslipidemia, hyper tension, CCI, baseline creatinine, EuroSCORE, type of surgical procedure (valve, Coronary Artery Bypass Grafting (CABG), combined valve and CABG, others), and extra corporal circulation. | ★★★ | ★  | ★★★ |
| Holzmann, 2013 <sup>10</sup> | 4.1 | 67 | 18631<br>(79) | Age, sex, preoperative eGFR, atrial fibrillation, diabetes mellitus, peripheral vascular disease and prior heart failure,                                                                                                                                                                                                                                                  | ★★★ | ★★ | ★★★ |
| James, 2011 <sup>11</sup>    | 1.6 | 64 | 10560<br>(71) | Age, sex, baseline serum creatinine, baseline eGFR, proteinuria, diabetes, hypertension, hyperlipidemia, heart failure, cerebrovascular disease, peripheral vascular disease, chronic pulmonary disease, liver disease, malignancy, current smoker, acute coronary syndrome, coronary vascular disease, LVEF, and procedures                                               | ★★★ | ★★ | ★★★ |
| Jose, 2006 <sup>12</sup>     | 3.5 | 59 | 1544<br>(83)  | Age, sex, baseline creatinine (1.0, 1.0 to 2.0, and 2.0 mg/dl), history of hypertension, history of diabetes, history of dyslipidemia, history of CHF, left ventricular ejection fraction, previous MI, use of diuretics, and treatment assignment.                                                                                                                        | ★★★ | ★★ | ★★★ |
| Kim, 2014 <sup>13</sup>      | 2.2 | 70 | 200<br>(67)   | Age>70, female sex, LV systolic dysfunction, acute coronary syndrome, eGFR, shock, PCI for LM disease, required hemodialysis after PCI.                                                                                                                                                                                                                                    | ★★★ | ★  | ★★★ |
| Lindsay, 2003 <sup>14</sup>  | 1.0 | 63 | 4009<br>(67)  | Revascularization, prior PCI, prior MI, prior CABG, unstable angina, diabetes (age and sex removed after stepwise regression)                                                                                                                                                                                                                                              | ★★★ | ★  | ★★★ |
| Metra, 2008 <sup>15</sup>    | 1.3 | 68 | 190<br>(60)   | Age, sex, body mass index, systolic blood pressure, heart rate, NYHA class, serum                                                                                                                                                                                                                                                                                          | ★★★ | ★  | ★★★ |

|                                |     |    |               |                                                                                                                                                                                                                                                                                                                                                                                                                                                                                                                                                                                                  |     |    |     |
|--------------------------------|-----|----|---------------|--------------------------------------------------------------------------------------------------------------------------------------------------------------------------------------------------------------------------------------------------------------------------------------------------------------------------------------------------------------------------------------------------------------------------------------------------------------------------------------------------------------------------------------------------------------------------------------------------|-----|----|-----|
|                                |     |    |               | haemoglobin, creatinine, BUN, and sodium, both on admission and at discharge, left ventricular (LV) ejection fraction (EF) and a restrictive pattern of LV filling at Doppler-echocardiography, treatment with intravenous vasodilator and/or inotropic agents during the hospitalisation, prescription of angiotensin-converting enzyme inhibitors, angiotensin receptor blockers, beta-blockers, aldosterone antagonists, digoxin and/or furosemide at discharge, as well as daily furosemide doses during the hospitalisation and at discharge.                                               |     |    |     |
| Mielniczuk, 2009 <sup>16</sup> | 2.0 | 60 | 2886<br>(76)  | Age, male sex, CRP quartile, baseline eGFR as a continuous variable, total cholesterol, triglycerides, low-density lipoprotein (LDL), history of hypertension, peripheral vascular disease, diabetes, current smoking, previous MI, left ventricular (LV) dysfunction, index diagnosis, catheterization or percutaneous intervention (PCI) for index event, treatment randomization, history of diuretic use within 7 d of admission, new or increase in diuretics in the first 30 d, angiotensin converting enzyme (ACE) inhibitor use at discharge, and new ACE inhibitor use in first 30 days | ★★★ | ★★ | ★★★ |
| Narula, 2014 <sup>17</sup>     | 3.0 | 63 | 514<br>(76)   | age, sex, diabetes mellitus, smoking, Killip class>1, LVEF, and anaemia                                                                                                                                                                                                                                                                                                                                                                                                                                                                                                                          | ★★★ | ★  | ★★★ |
| Olsson, 2013 <sup>18</sup>     | 4.1 | 67 | 18940<br>(79) | Age, sex, diabetes mellitus, estimated glomerular filtration rate, left ventricular ejection fraction, and myocardial infarction before surgery or during follow-up                                                                                                                                                                                                                                                                                                                                                                                                                              | ★★★ | ★★ | ★★★ |

|                                       |     |    |               |                                                                                                                                                                                                                                                                                                                                                                                                                                                                                                                                                          |     |    |     |
|---------------------------------------|-----|----|---------------|----------------------------------------------------------------------------------------------------------------------------------------------------------------------------------------------------------------------------------------------------------------------------------------------------------------------------------------------------------------------------------------------------------------------------------------------------------------------------------------------------------------------------------------------------------|-----|----|-----|
| Ozrazgat-Baslanti, 2016 <sup>19</sup> | 7   | 55 | 22828<br>(50) | Age, sex, ethnicity, charlson comorbidity index, hypertension, diabetes, chronic obstructive pulmonary disease, peripheral vascular disease, cerebrovascular disease, congestive heart failure, myocardial infarction, emergent surgery, surgery type, admission hemoglobin, and number of postoperative complications                                                                                                                                                                                                                                   | ★★★ | ★  | ★★★ |
| Ryden, 2014 <sup>20</sup>             | 5.0 | 67 | 21962<br>(79) | Age, sex, diabetes mellitus, estimated glomerular filtration rate, left ventricular ejection fraction, prior MI, heart failure or stroke.                                                                                                                                                                                                                                                                                                                                                                                                                | ★★★ | ★★ | ★★★ |
| Shirakabe, 2012 <sup>21</sup>         | 1.0 | 71 | 340<br>(68)   | Age (> 72 years old, yes or no), type of HF (new onset or worsening), etiology of HF (ischemia or non- ischemia), sex (male or female), NYHA class (III or IV), blood urea nitrogen (> 21.4 mg/dL, yes or no), creatinine (> 1.11 mg/dL, yes or no), total bilirubin (> 0.60 mg/dL, yes or no), sodium (< 141 mmol/L, yes or no), potassium (> 4.20 mmol/L, yes or no), hemoglobin (< 12.7 g/dL, yes or no), C- reactive protein (< 0.55 mg/dL, yes or no), systolic blood pressure (SBP) (< 160 mmHg, yes or no), pulse (< 116 beats/minute, yes or no) | ★★★ | ★★ | ★★★ |
| Tsai, 2015 <sup>22</sup>              | 2.5 | 70 | 2230<br>(78)  | Age, sex, diabetes, hypertension, chronic kidney disease, gout, dyslipidemia, atrial fibrillation, heart failure, malignancy, COPD, liver disease, high volume center, and medical center                                                                                                                                                                                                                                                                                                                                                                | ★★★ | ★★ | ★★★ |
| Uyarel, 2009 <sup>23</sup>            | 1.8 | 56 | 2091<br>(83)  | Age, sex, diabetes, hypertension, chronic kidney disease, gout, dyslipidemia, atrial fibrillation, heart failure, malignancy, COPD, liver disease, high volume center, and medical center                                                                                                                                                                                                                                                                                                                                                                | ★★★ | ★  | ★★★ |
| Watabe, 2014 <sup>24</sup>            | 1.2 | 70 | 819<br>(77)   | Age, sex, CKD, Killip Class, Peak CK>4000, and IABP                                                                                                                                                                                                                                                                                                                                                                                                                                                                                                      | ★★★ | ★  | ★★★ |

|                        |     |    |              |                                                                                                                                                                                                                      |      |    |     |
|------------------------|-----|----|--------------|----------------------------------------------------------------------------------------------------------------------------------------------------------------------------------------------------------------------|------|----|-----|
| Wu, 2014 <sup>25</sup> | 3.4 | 63 | 4976<br>(58) | Sex, Age, Charlson Score, CHF, Dementia,<br>COPD, Rheumatological Disease, Hemiplegia,<br>Tumor, DM, Moderate or severe liver disease,<br>Chronic kidney disease, in-hospital comorbidity,<br>and operative category | ★★★★ | ★★ | ★★★ |
|------------------------|-----|----|--------------|----------------------------------------------------------------------------------------------------------------------------------------------------------------------------------------------------------------------|------|----|-----|

**Supplemental Table 2: Subgroup Analysis for the Association Between Acute Kidney Injury and Cardiovascular Mortality**

| <b>Stratification</b>                                           | <b>Number of Studies</b> | <b>Relative Risk</b> | <b>95% CI</b> | <b>I<sup>2</sup> (%)</b> | <b>P-value</b> |
|-----------------------------------------------------------------|--------------------------|----------------------|---------------|--------------------------|----------------|
| <b>CVD Mortality – Setting</b>                                  |                          |                      |               |                          |                |
| CIN                                                             | 3                        | 2.42                 | 1.49-3.91     | 27                       | 0.36           |
| Other                                                           | 2                        | 1.59                 | 1.16-2.19     | 0                        |                |
| <b>CVD Mortality – Median Proportion Baseline CHF (min-max)</b> |                          |                      |               |                          |                |
| 0.06; 0.05-0.06]                                                | 3                        | 1.68                 | 1.28-2.19     | 0                        | 0.35           |
| 0.09; 0.06-0.11]                                                | 2                        | 2.61                 | 1.08-6.30     | 72                       |                |
| <b>CVD Mortality – Median Proportion Baseline CKD (min-max)</b> |                          |                      |               |                          |                |
| 0.10; 0-0.20]                                                   | 2                        | 2.61                 | 1.08-6.30     | 72                       | 0.38           |
| 0.66; 0.33-1]                                                   | 2                        | 1.71                 | 1.24-2.36     | 0                        |                |

CVD is cardiovascular, CHF is congestive heart failure, and CIN is contrast induced nephropathy. There were insufficient studies to examine the prognostic significance of AKI by setting (Peri-operative or ICU), severity of AKI, recovery of renal function, and proportion of participants with baseline stroke and baseline ischemic heart disease. With respect to the analysis based on the proportion of participants with baseline IHD: in 5 of 6 studies, 100% of participants had baseline IHD, therefore not meeting our criteria for at least two studies in each strata.



**Supplemental Table 3: Subgroup Analysis for the Association Between Acute Kidney Injury and Major Cardiovascular Events**

| <b>Stratification</b>                                     | <b>Number of Studies</b> | <b>Relative Risk</b> | <b>95% CI</b> | <b>I<sup>2</sup> (%)</b> | <b>P-value</b> |
|-----------------------------------------------------------|--------------------------|----------------------|---------------|--------------------------|----------------|
| <b>MACE – Setting</b>                                     |                          |                      |               |                          |                |
| Other                                                     | 4                        | 1.29                 | 1.19-1.41     | 20                       | -              |
| <b>MACE – Median Proportion Baseline CHF (min-max)</b>    |                          |                      |               |                          |                |
| [0.10; 0.05-0.14]                                         | 3                        | 1.52                 | 1.10-2.08     | 70                       | 0.63           |
| [1; 0.15-1]                                               | 3                        | 1.39                 | 1.22-1.59     | 0                        |                |
| <b>MACE – Median Proportion Baseline IHD (min-max)</b>    |                          |                      |               |                          |                |
| [0.56; 0.54-0.71]                                         | 3                        | 1.39                 | 1.22-1.59     | 0                        |                |
| [1; 1-1]                                                  | 3                        | 1.52                 | 1.10-2.08     | 70                       | 0.63           |
| <b>MACE – Median Proportion Baseline Stroke (min-max)</b> |                          |                      |               |                          |                |
| [0.06; 0.02-0.06]                                         | 3                        | 1.29                 | 1.16-1.45     | 26                       | 0.18           |
| [0.08; 0.07-0.08]                                         | 2                        | 1.68                 | 1.17-2.42     | 50                       |                |

IHD is ischemic heart disease and CHF is congestive heart failure. There were insufficient studies to examine the prognostic significance of AKI by setting (contrast induced nephropathy and Peri-operative), severity of AKI, recovery of renal function and by the baseline proportion of adults with chronic kidney disease.

**Supplemental Table 4: Subgroup Analysis for the Association Between Acute Kidney Injury and Stroke**

| <b>Stratification</b>                                       | <b>Number of Studies</b> | <b>Relative Risk</b> | <b>95% CI</b> | <b>I2 (%)</b> | <b>P-value</b> |
|-------------------------------------------------------------|--------------------------|----------------------|---------------|---------------|----------------|
| <b>Stroke – Setting</b>                                     |                          |                      |               |               |                |
| Peri-operative                                              | 2                        | 1.12                 | 0.98-1.28     | 0             | 0.70           |
| Other                                                       | 2                        | 1.24                 | 1.01-1.51     | 0             |                |
| <b>Stroke – Severity</b>                                    |                          |                      |               |               |                |
| Mild AKI                                                    | 3                        | 1.18                 | 1.02-1.36     | 0             | 0.91           |
| Moderate to Severe AKI                                      | 3                        | 1.20                 | 0.90-1.60     | 0             |                |
| <b>Stroke – Median Proportion Baseline CHF (min-max)</b>    |                          |                      |               |               |                |
| [0.04; 0-0.05]                                              | 3                        | 1.12                 | 0.97-1.28     | 0             | 0.43           |
| [0.13; 0.12-0.15]                                           | 2                        | 1.23                 | 1.02-1.48     | 0             |                |
| <b>Stroke – Median Proportion Baseline IHD (min-max)</b>    |                          |                      |               |               |                |
| [0.15; 0.12-0.72]                                           | 3                        | 1.18                 | 1.01-1.38     | 0             | 0.65           |
| [1; 1-1]                                                    | 2                        | 1.13                 | 0.97-1.31     | 0             |                |
| <b>Stroke – Median Proportion Baseline Stroke (min-max)</b> |                          |                      |               |               |                |
| [0; 0-0]                                                    | 3                        | 1.16                 | 1.04-1.29     | 0             | 0.73           |
| [0.07; 0.06-0.07]                                           | 2                        | 1.06                 | 0.67-1.70     | 0             |                |
| <b>Stroke – Median Proportion Baseline CKD (min-max)</b>    |                          |                      |               |               |                |
| [0.11; 0.09-0.12]                                           | 2                        | 1.19                 | 1.01-1.41     | 0             | 0.61           |
| [0.21; 0.19-0.24]                                           | 2                        | 1.13                 | 0.98-1.30     | 0             |                |

IHD is ischemic heart disease. There were insufficient studies to examine the prognostic significance of AKI by setting (contrast induced nephropathy) and recovery of renal function.

**Supplemental Figure 1: Identification of Included Studies**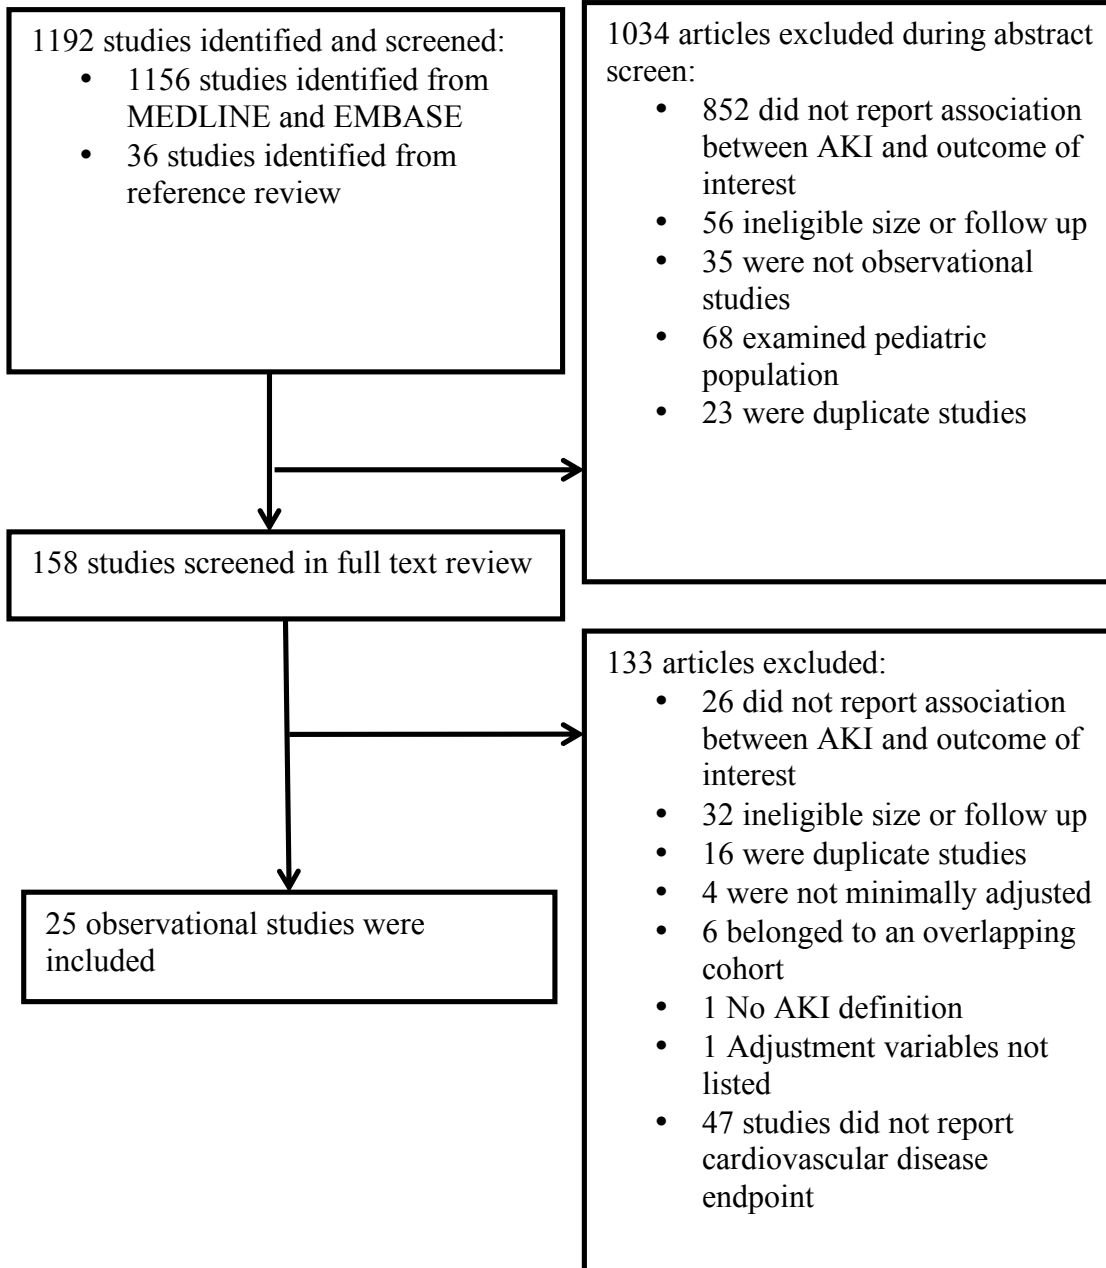

### Supplementary Figure 2: Association between Acute Kidney Injury and Cardiovascular Mortality

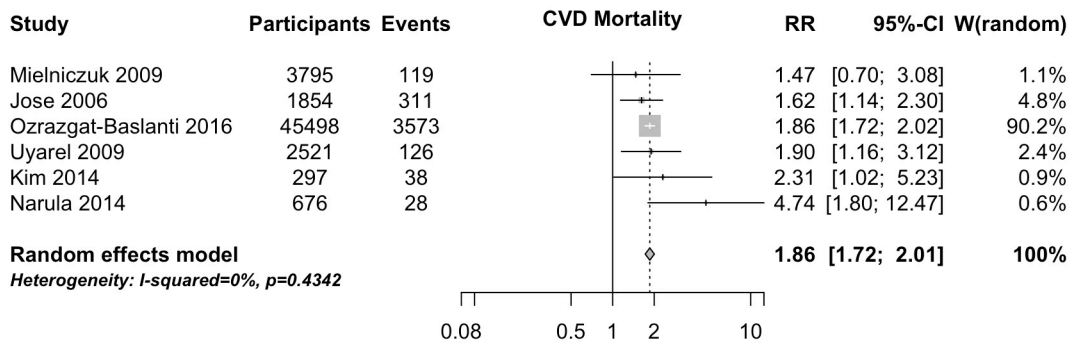

CVD is cardiovascular. Area of each square is proportional to the inverse variance of the estimate. Horizontal lines indicate 95% confidence intervals. W(Random) is the weight of each study.

### Supplementary Figure 3: Association between Acute Kidney Injury and Major Adverse Cardiovascular Events

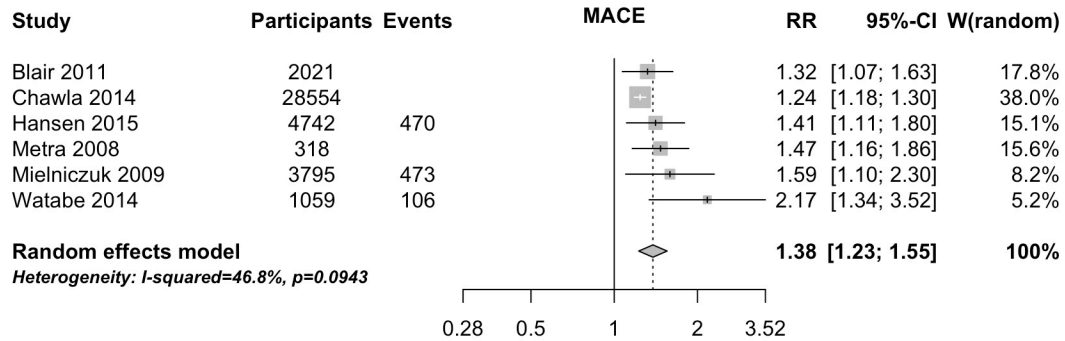

MACE is major adverse cardiovascular events. Area of each square is proportional to the inverse variance of the estimate. Horizontal lines indicate 95% confidence intervals. W(Random) is the weight of each study.

### Supplementary Figure 4: Association between Acute Kidney Injury and Congestive Heart Failure

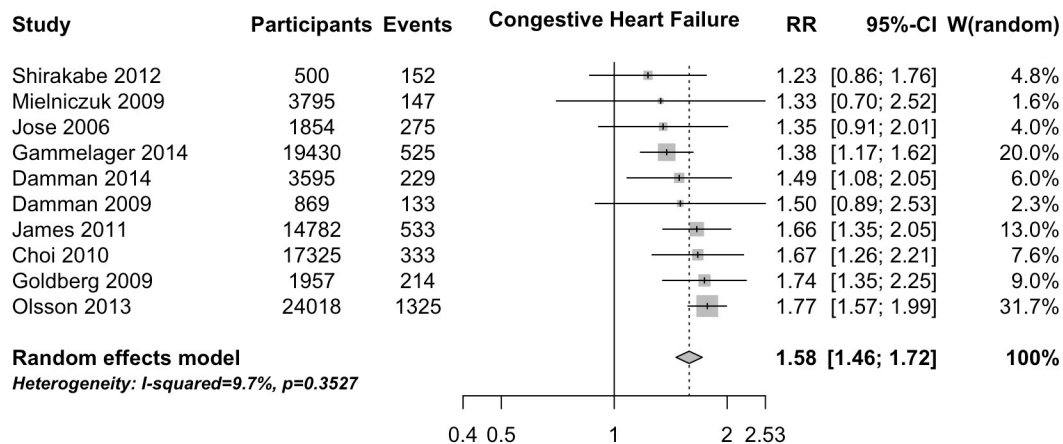

Area of each square is proportional to the inverse variance of the estimate. Horizontal lines indicate 95% confidence intervals. W(Random) is the weight of each study.

### Supplementary Figure 5: Association between Acute Kidney Injury and Acute Myocardial Infarction

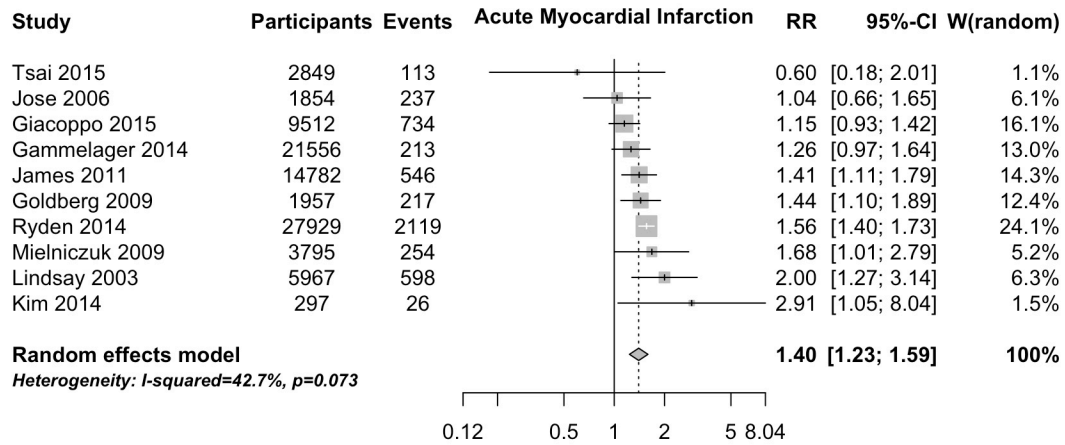

Area of each square is proportional to the inverse variance of the estimate. Horizontal lines indicate 95% confidence intervals. W(Random) is the weight of each study.

### Supplementary Figure 6: Association between Acute Kidney Injury and Stroke

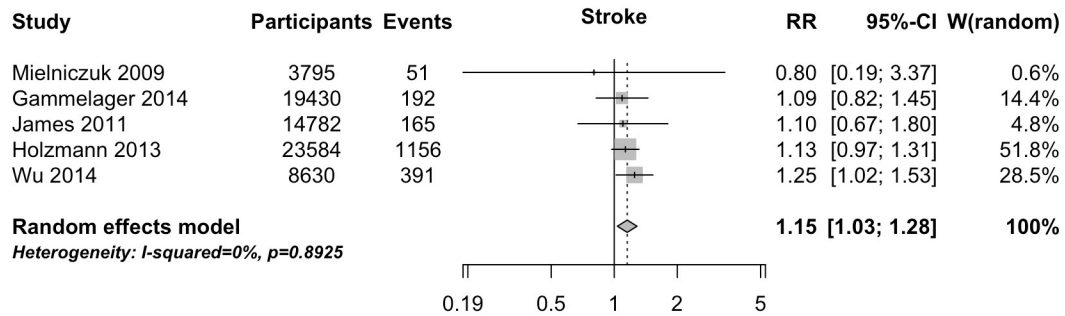

Area of each square is proportional to the inverse variance of the estimate. Horizontal lines indicate 95% confidence intervals. W(Random) is the weight of each study.



### Supplemental Figure 7: Funnel Plot for the Association Between Acute Kidney Injury and Congestive Heart Failure

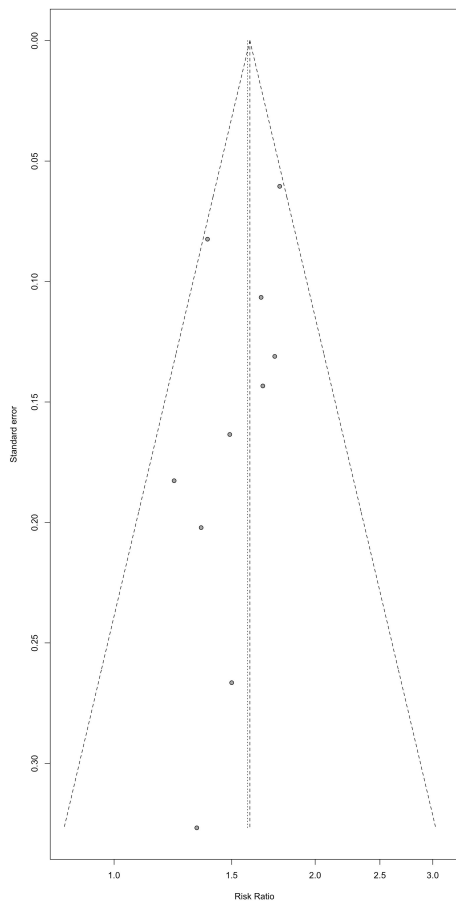

### Supplemental Figure 8: Funnel Plot for the Association Between Acute Kidney Injury and Acute Myocardial Infarction

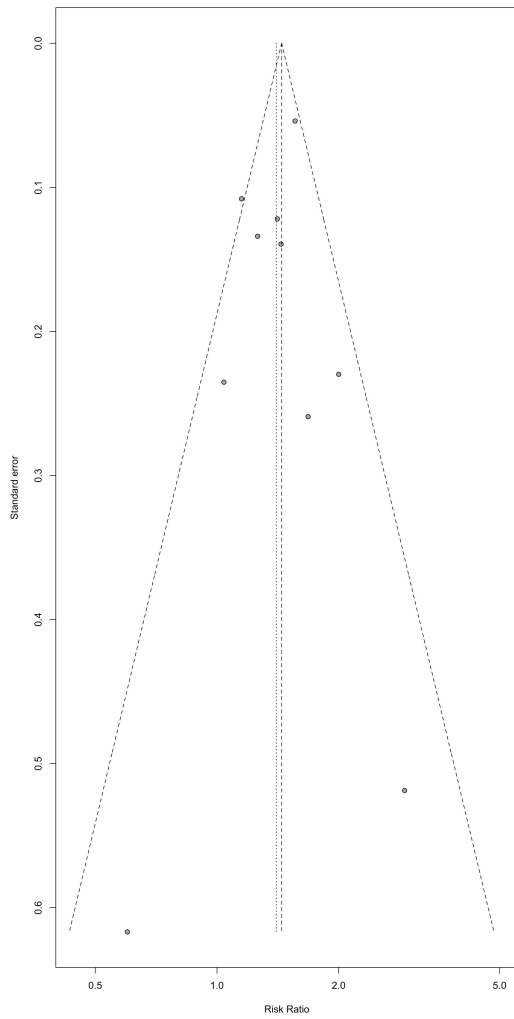

## REFERENCES

1. Blair JEA, Pang PS, Schrier RW, Metra M, Traver B, Cook T, Campia U, Ambrosy A, Burnett JC, Grinfeld L, Maggioni AP, Swedberg K, Udelson JE, Zannad F, Konstam MA, Gheorghiade M, EVEREST Investigators: Changes in renal function during hospitalization and soon after discharge in patients admitted for worsening heart failure in the placebo group of the EVEREST trial. *Eur Heart J* 32: 2563–2572, 2011
2. Chawla LS, Amdur RL, Shaw AD, Faselis C, Palant CE, Kimmel PL: Association between AKI and long-term renal and cardiovascular outcomes in United States veterans. *Clinical journal of the American Society of Nephrology : CJASN* 9: 448–456, 2014
3. Choi AI, Li Y, Parikh C, Volberding PA, Shlipak MG: Long-term clinical consequences of acute kidney injury in the HIV-infected. *Kidney Int* 78: 478–485, 2010
4. Damman K, Jaarsma T, Voors AA, Navis G, Hillege HL, van Veldhuisen DJ, COACH investigators: Both in- and out-hospital worsening of renal function predict outcome in patients with heart failure: results from the Coordinating Study Evaluating Outcome of Advising and Counseling in Heart Failure (COACH). *Eur. J. Heart Fail.* 11: 847–854, 2009
5. Damman K, Valente MAE, Voors AA, O'Connor CM, van Veldhuisen DJ, Hillege HL: Renal impairment, worsening renal function, and outcome in patients with heart failure: an updated meta-analysis. *Eur Heart J* 35: 455–469, 2014
6. Gammelager H, Christiansen CF, Johansen MB, Tønnesen E, Jespersen B, Sørensen HT: Three-year risk of cardiovascular disease among intensive care patients with acute kidney injury: a population-based cohort study. *Crit Care* 18: 492, 2014
7. Giacoppo D, Madhavan MV, Baber U, Warren J, Bansilal S, Witzendichler B, Dangas GD, Kirtane AJ, Xu Ke, Kornowski R, Brener SJ, Généreux P, Stone GW, Mehran R: Impact of Contrast-Induced Acute Kidney Injury After Percutaneous Coronary Intervention on Short- and Long-Term Outcomes: Pooled Analysis From the HORIZONS-AMI and ACUITY Trials. *Circ Cardiovasc Interv* 8: e002475, 2015
8. Goldberg A, Kogan E, Hammerman H, Markiewicz W, Aronson D: The impact of transient and persistent acute kidney injury on long-term outcomes after acute myocardial infarction. *Kidney Int* 76: 900–906, 2009
9. Hansen MK, Gammelager H, Jacobsen C-J, Hjortdal VE, Layton JB, Rasmussen BS, Andreasen JJ, Johnsen SP, Christiansen CF: Acute Kidney Injury and Long-

- term Risk of Cardiovascular Events After Cardiac Surgery: A Population-Based Cohort Study. *J. Cardiothorac. Vasc. Anesth.* 29: 617–625, 2015
10. Holzmann MJ, Rydén L, Sartipy U: Acute kidney injury and long-term risk of stroke after coronary artery bypass surgery. *Int J Cardiol* 168: 5405–5410, 2013
  11. James MT, Ghali WA, Knudtson ML, Ravani P, Tonelli M, Faris P, Pannu N, Manns BJ, Klarenbach SW, Hemmelgarn BR, Alberta Provincial Project for Outcome Assessment in Coronary Heart Disease (APPROACH) Investigators: Associations between acute kidney injury and cardiovascular and renal outcomes after coronary angiography. *Circulation* 123: 409–416, 2011
  12. Jose P, Skali H, Anavekar N, Tomson C, Krumholz HM, Rouleau JL, Moya L, Pfeffer MA, Solomon SD: Increase in creatinine and cardiovascular risk in patients with systolic dysfunction after myocardial infarction. *J Am Soc Nephrol* 17: 2886–2891, 2006
  13. Kim J-H, Yang JH, Choi S-H, Song YB, Hahn J-Y, Choi J-H, Lee SH, Gwon H-C: Predictors of outcomes of contrast-induced acute kidney injury after percutaneous coronary intervention in patients with chronic kidney disease. *Am J Cardiol* 114: 1830–1835, 2014
  14. Lindsay J, Apple S, Pinnow EE, Gevorkian N, Gruberg L, Satler LF, Pichard AD, Kent KM, Suddath W, Waksman R: Percutaneous coronary intervention-associated nephropathy foreshadows increased risk of late adverse events in patients with normal baseline serum creatinine. *Catheter Cardiovasc Interv* 59: 338–343, 2003
  15. Metra M, Nodari S, Parrinello G, Bordonali T, Bugatti S, Danesi R, Fontanella B, Lombardi C, Milani P, Verzura G, Cotter G, Dittrich H, Massie BM, Dei Cas L: Worsening renal function in patients hospitalised for acute heart failure: clinical implications and prognostic significance. *Eur. J. Heart Fail.* 10: 188–195, 2008
  16. Mielniczuk LM, Pfeffer MA, Lewis EF, Blazing MA, de Lemos JA, Mohanavelu S, Rouleau J, Fox K, Pedersen TR, Califf RM: Acute decline in renal function, inflammation, and cardiovascular risk after an acute coronary syndrome. *Clinical journal of the American Society of Nephrology : CJASN* 4: 1811–1817, 2009
  17. Narula A, Mehran R, Weisz G, Dangas GD, Yu J, Généreux P, Nikolsky E, Brener SJ, Witzenbichler B, Guagliumi G, Clark AE, Fahy M, Xu Ke, Brodie BR, Stone GW: Contrast-induced acute kidney injury after primary percutaneous coronary intervention: results from the HORIZONS-AMI substudy. *Eur Heart J* 35: 1533–1540, 2014
  18. Olsson D, Sartipy U, Braunschweig F, Holzmann MJ: Acute kidney injury following coronary artery bypass surgery and long-term risk of heart failure. *Circ Heart Fail* 6: 83–90, 2013

19. Ozrazgat-Baslanti T, Thottakkara P, Huber M, Berg K, Gravenstein N, Tighe P, Lipori G, Segal MS, Hobson C, Bihorac A: Acute and Chronic Kidney Disease and Cardiovascular Mortality After Major Surgery. *Annals of Surgery* 2016
20. Rydén L, Ahnve S, Bell M, Hammar N, Ivert T, Sartipy U, Holzmann MJ: Acute kidney injury after coronary artery bypass grafting and long-term risk of myocardial infarction and death. *Int J Cardiol* 172: 190–195, 2014
21. Shirakabe A, Hata N, Kobayashi N, Shinada T, Tomita K, Tsurumi M, Matsushita M, Okazaki H, Yamamoto Y, Yokoyama S, Asai K, Mizuno K: Long-term prognostic impact after acute kidney injury in patients with acute heart failure. *Int Heart J* 53: 313–319, 2012
22. Tsai M-L, Mao C-T, Chen D-Y, Hsieh I-C, Wen M-S, Chen T-H: Short- and long-term major cardiovascular adverse events in carotid artery interventions: a nationwide population-based cohort study in Taiwan. *PLoS ONE* 10: e0121016, 2015
23. Uyarel H, Cam N, Ergelen M, Akkaya E, Ayhan E, Isik T, Cicek G, Gunaydin ZY, Osmonov D, Gul M, Demirci D, Guney MR, Ozturk R, Yekeler I: Contrast-induced nephropathy in patients undergoing primary angioplasty for acute myocardial infarction: incidence, a simple risk score, and prognosis. *Archives of Medical Sciences* 4: 550–558, 2009
24. Watabe H, Sato A, Hoshi T, Takeyasu N, Abe D, Akiyama D, Kakefuda Y, Nishina H, Noguchi Y, Aonuma K: Association of contrast-induced acute kidney injury with long-term cardiovascular events in acute coronary syndrome patients with chronic kidney disease undergoing emergent percutaneous coronary intervention. *Int J Cardiol* 174: 57–63, 2014
25. Wu V-C, Wu P-C, Wu C-H, Huang T-M, Chang C-H, Tsai P-R, Ko W-J, Chen L, Wang C-Y, Chu T-S, Wu K-D, National Taiwan University Study Group on Acute Renal Failure (NSARF) Group: The impact of acute kidney injury on the long-term risk of stroke. *Journal of the American Heart Association* 3: 2014
